# 1 Selecting species for restoration in foundational 2 assemblages

3  
4 Joshua S. Madin<sup>1\*</sup>, Michael McWilliam<sup>1</sup>, Kate Quigley<sup>2</sup>, Line K. Bay<sup>2</sup>, David Bellwood<sup>3</sup>,  
5 Thomas Bridge<sup>4</sup>, Christopher Doropoulos<sup>5</sup>, Leanne Fernandes<sup>6</sup>, Peter Harrison<sup>7</sup>, Andrew S.  
6 Hoey<sup>3</sup>, Peter J. Mumby<sup>8</sup>, Zoe T. Richards<sup>9</sup>, Cynthia Riginos<sup>8</sup>, David J. Suggett<sup>10</sup>, Madeleine J. H.  
7 van Oppen<sup>2,11</sup>

- 8  
9 1. Hawaiʻi Institute of Marine Biology, University of Hawaiʻi at Manoa, Kāneʻohe, Hawaiʻi,  
10 USA  
11 2. Australian Institute of Marine Science, Townsville, Queensland, Australia  
12 3. ARC Centre of Excellence for Coral Reef Studies, James Cook University, Townsville,  
13 Queensland, Australia  
14 4. Museum of Tropical Queensland, Townsville, Queensland, Australia  
15 5. CSIRO Oceans & Atmosphere, Brisbane, Queensland, Australia  
16 6. Great Barrier Reef Marine Park Authority, Townsville, Queensland, Australia  
17 7. Marine Ecology Research Centre at Southern Cross University, New South Wales, Australia  
18 8. School of Biological Sciences, The University of Queensland, St. Lucia, Queensland,  
19 Australia  
20 9. Coral Conservation and Research Group, Trace and Environmental DNA Laboratory, School  
21 of Molecular and Life Sciences, Curtin University, Bentley, Western Australia, Australia  
22 10. University of Technology Sydney, Climate Change Cluster, Sydney, New South Wales,  
23 Australia  
24 11. School of BioSciences, The University of Melbourne, Parkville, Victoria, Australia

25  
26 [\\*jmadin@hawaii.edu](mailto:jmadin@hawaii.edu)

27 **Abstract**

28

29 1. Humans have long sought to restore species but little attention has been directed at how  
30 best to do so for rich assemblages of foundation species that support ecosystems, like  
31 rainforests and coral reefs that are increasingly threatened by environmental change.

32 2. We developed a two-part triage process for selecting optimized sets of species for  
33 restoration. We demonstrated this process using phenotypic traits and ecological  
34 characteristics for reef building corals found along the east coast of Australia. Without  
35 clear linkages between phenotypic traits and ecosystem functions, the first part of the  
36 triage hedges against function loss by ensuring an even spread of life history traits. The  
37 second part hedges against future species losses by weighting species based on  
38 characteristics that are known to increase their ecological persistence to current  
39 environmental pressures—abundance, species range and thermal bleaching tolerance—  
40 as well as their amenability to restoration methods.

41 3. We identified sets of ecologically persistent and restorable species most likely to protect  
42 against functional loss by examining marginal returns in occupancy of phenotypic trait  
43 space per restored species.

44 4. We also compared sets of species with those from the southern-most accretional reef as  
45 well as a coral restoration program to demonstrate how trait space occupancy is likely to  
46 protect against local loss of ecosystem function.

47 5. *Synthesis and applications.* A quantitative approach to selecting sets of foundational  
48 species for restoration can inform decisions about ecosystem protection to guide and  
49 optimize future restoration efforts. The approach addresses the need to insure against  
50 unpredictable losses of ecosystem functions by investing in a wide range of phenotypes.  
51 Furthermore, the flexibility of the approach enables the functional goals of restoration to  
52 vary depending on environmental context, stakeholder values, and the spatial and  
53 temporal scales at which meaningful impacts can be achieved.

54

55 **Keywords**

56

57 Restoration; foundation species; triage; phenotypic traits; ecosystem function; hermatypic corals

## 58 **Introduction**

59

60 The rate and extent of environmental change experienced by contemporary ecosystems have  
61 resulted in major deviations from their historical state (Hobbs et al., 2011). Conservation alone  
62 may therefore no longer suffice to preserve biodiversity and ecosystem functions, and restoration  
63 is often considered a now required addition. The objective of ecosystem restoration is, through  
64 human intervention, to recover a disturbed or degraded ecosystem as far as possible towards  
65 some previous state. Interventions in the coastal and marine realm can be direct, such as  
66 propagation and field deployment of habitat builders through seeds (e.g., seagrass in Virginia –  
67 Orth et al., 2020), propagules (e.g., oysters in South Australia - Vanderklift et al., 2020), early  
68 recruits (e.g., kelp - Fredriksen et al., 2020; coral - Randall et al., 2020) or parts of adult tissues  
69 (e.g., coral gardening - Rinkevich 2014). Indirect interventions, such as physical stabilization of  
70 degraded reef structures are also possible (Ceccarelli et al., 2020).

71

72 To date, the augmentation or reintroduction of one or few species has been the most common  
73 approach, such as the restoration of the endangered Caribbean coral species *Acropora*  
74 *cervicornis* and *A. palmata* (Ladd et al., 2019), the reintroduction of the greater bilby in some  
75 parts of Australia (Lott et al., 2020), the gray wolf across parts of Europe and North America  
76 (Ripple et al 2014), and assisted colonization of the Tasmanian Devil to the Australian mainland  
77 (Brainard 2020). However, climate change is now affecting many assemblages of foundation  
78 species in most if not all the world's ecosystems—forests, kelp forest, and coral reefs—leading  
79 to a necessary broadening of focus of restoration activities to encompass more species and their  
80 contributions to ecosystem functioning (Brudvig & Mabry 2008; Ladouceur & Shackelford  
81 2021).

82

83 Prioritizing sets of species for the restoration of biodiverse ecosystems is a challenging task, and  
84 different approaches for decision making have been used. For instance, some approaches focus  
85 on the roles that species play in providing particular ecosystem goods or services, including  
86 carbon storage in rainforests (Strassburg et al., 2020) or mangrove forests (Adame et al., 2014),  
87 or reef accretion on coral reefs for coastal protection (Bellwood et al., 2019). Another often used  
88 focus is on keystone species: species that maintain the organization, stability, and function of

89 their communities, and have disproportionately large, inimitable impacts on their ecosystems  
90 (Hale et al., 2018). Alternatively, weedy pioneer species may quickly restore habitat functions  
91 such as such as providing shelter or stabilizing substratum, such as the emphasis on fast growing  
92 acroporids in coral gardening initiatives (Bostrom-Einarsson et al., 2020). However, the  
93 objective selection of species based on defined ecological, functional and logistical criteria are  
94 rare (Suding et al., 2004; Lamb 2018). Some examples exist for forest restoration (Meli et al.,  
95 2013), and some have used linkages between phenotypic traits and ecosystem functions to select  
96 species (Giannini et al., 2017; Rayome et al., 2019).

97

98 An overarching challenge is that restoration initiatives need to anticipate future ecosystem states  
99 which are expected to be very different due to the escalating impacts of climate change (Rogers  
100 et al., 2015; Gaitán-Espitia & Hobday 2021). Faced with complex ecosystems, multiple threats  
101 to biodiversity and limited funding, conservation practitioners must prioritize investment into  
102 different management options, including restoration actions, and difficult decisions must be  
103 made about which sets of species to allocate resources to (Game et al., 2018). Strategic decisions  
104 must be taken about supporting those most likely to do better to improve future persistence and  
105 resilience, and those that will struggle and potentially push them through a period of elevated and  
106 prolonged stress; especially those that are already closer to their existing physiological limits,  
107 like reef-building corals. Protecting habitat-forming species such as corals is imperative for  
108 securing the ecological functions and socio-economic services they provide such as reef  
109 building, habitat and food provisioning for commercially important species, primary production,  
110 nutrient recycling, natural products, and social, cultural and recreational opportunities.

111

112 In this paper, we developed a two-part triage process for selecting sets of species for the  
113 restoration or maintenance of foundational assemblages, for which we use reef-building corals as  
114 an example. The first part centered on the restoration of ecosystem functions provided by  
115 foundational assemblages, such as habitat engineering (Ellison et al., 2005) (Fig. 1). However,  
116 rather than targeting specific ecosystem functions (Fig. 1a), we propose to minimize loss of  
117 function by maximizing phenotypic variation (Fig. 1b) for several reasons. First, mechanistic  
118 linkages between phenotypic traits of species and functions are poorly understood, especially for  
119 coral reefs (Bellwood et al., 2019). Second, the species that support specific functions are likely

120 to differ depending on the situation (e.g., disturbance history) and site-specific conditions. Third,  
121 maximizing life history variation minimizes the risk of wholesale species loss, because no  
122 species is at a selective optimum in all situations and environments (Stearns 1992). Fourth,  
123 important ecosystem functions, such as habitat engineering and ecological succession, tend to be  
124 supported by a broad range of life history combinations (e.g., builders, fillers and cementers  
125 [Goreau 1963]; weedy, competitive and stress-tolerant [Darling et al., 2012]). Finally, a bet  
126 hedging approach also acts to increase phylogenetic diversity because many life history traits are  
127 evolutionarily conserved (Westoby et al., 2002).

128

129 The second part of the triage process is to select species based on characteristics that make them  
130 better equipped to avoid depletion and resist or recover from large-scale events like fires or  
131 marine heatwaves (Fig. 1c). For example, species with small range sizes and small local  
132 populations generally have a higher extinction risk (Staudé et al., 2020), while species with  
133 higher local abundances tend to bounce back faster following disturbance (Halford et al., 2004).  
134 Often there are synergistic relationships—for example, extinction risk tends to be greater for  
135 geographically limited and locally rare species (double jeopardy; Brown 1984)—but not always  
136 (Hughes et al., 2014). Meanwhile, some species are more tolerant to disturbances and gradual  
137 changes that are expected to become more frequent or more intense in the future through rapid  
138 adaptation. Suitability of species to restoration can also be considered as a characteristic of  
139 ecological persistence; albeit one requiring human intervention (Suggett et al., 2019). For  
140 example, restoration may be facilitated by the use of species that can be easily propagated in the  
141 laboratory via sexual reproduction, grown in nurseries and outplanted, or manipulated in the field  
142 (Rinkevich 2020; Randall et al., 2020). Furthermore, some phenotypic traits and ecological  
143 characteristics make some species better candidates for restoration than others. For instance, it is  
144 easier to generate coral fragments from branching species than from massive species, therefore  
145 most restoration efforts on coral reefs have historically focused on branching corals (Bostrom-  
146 Einarsson et al., 2020). Similarly, restoring local areas with species that have large geographical  
147 ranges will improve connectivity (Hock et al., 2017).

148

149 The overall aim was to develop a quantitative approach to select a set of  $n$  species for restoration,  
150 recognizing that the goals of restoration can vary enormously across systems. The approach we

151 developed aims to maximize the probability of maintaining phylogenetic diversity and ecosystem  
152 function, and therefore protect against a range of sensitivities to future stressors. We demonstrate  
153 this approach with reef building corals found on the east coast of Australia, including the Great  
154 Barrier Reef, a region that has declined severely over the past few decades (De'ath et al., 2012;  
155 Hughes et al., 2017). Here, coral reef restoration activities are already underway to address the  
156 local-scale depletion of coral populations (Boström-Einarsson et al., 2020; Howlett et al., in  
157 review) and larger scale restoration interventions are in the research and development phase  
158 (Anthony et al. 2020). Although the data and results are only illustrative at this stage, and further  
159 scrutiny is required before making formal restoration decisions at appropriate and manageable  
160 scales (McAfee et al., 2021), it provides a quantitative, reproducible and adaptable basis for  
161 selecting species for restoration projects and restoration research.

162

## 163 **Materials and methods**

164

165 *Spectrum of life histories*—The first part of the process required collation of quantitative  
166 phenotypic traits for species that capture as many life history trade-offs as possible (Gallagher et  
167 al., 2020), such as acquisition-conservation and propagule size-number (Westoby et al., 2002).  
168 For our demonstration, we use a dataset for 396 species found along the east coast of Australia  
169 from McWilliam et al. (2018) with the following traits: growth rate, corallite width,  
170 rugosity/branch spacing, surface area per unit volume, colony height, maximum colony  
171 size/diameter, and skeletal density. The trait data enabled us to capture important dimensions of  
172 species life history, ranging from fast to slow growth (Darling et al., 2012), fragile to robust  
173 morphologies (Zawada et al., 2019), and small to large colonies that drives up colony fecundity  
174 (Alvarez-Noriega et al., 2016). The trait space was calculated using a principal components  
175 analysis (PCA) of the seven traits and is presented in Fig. 2a for the 396 species.

176

177 We also viewed the trait space through the lens of one ecosystem function, reef building, by  
178 adopting Goreau's (1963) classification of reef species into builders, fillers and cementers; an  
179 approach that has been supported by modern synthesis (González-Barrios & Alvarez Filip 2018).  
180 Within the McWilliam et al. (2018) trait space, builders were classified as species with the  
181 highest values of size, height, and volume; fillers with largest values of size and rugosity; and

182 cementers with the largest sizes and smallest height values (Fig. 2a, red vectors). Ecosystem  
183 functions such as reef building and habitat construction requires a broad range of life histories—  
184 ranging from slow growing, potentially large builders (i.e., late successional species) to dense  
185 skeleton, encrusting cementers to fast growing, morphological complex fillers (i.e., weedy or  
186 early successional species). Other functions tend to require specific trait combinations (Fig. 2b).  
187 For example, coral species with higher surface area to volume ratios, rugosities and growth rates  
188 tend to generate habitat complexity that is reportedly important as fish habitats (Graham & Nash  
189 2013) and have a high value for human uses, such as tourism and recreation, because they are  
190 generally considered aesthetically appealing (Marshall et al., 2019).

191  
192 While there are many definitions of phenotypic trait diversity (Villéger et al., 2008), our goal  
193 under a hedging strategy was to evenly capture the largest area of trait space with the fewest  
194 species, and therefore to ensure a spread of species along important trait dimensions. This goal  
195 was accomplished by iteratively removing the species closest to other species in the two-  
196 dimensional area defined by PC1 and PC2 (which captured about 70% total trait variation) until  
197 a given number of species  $n$  remained. Selection could also happen at higher dimensions to  
198 capture higher levels of variation. We tried two approaches to measure the proximity of species  
199 using R (R Core Team 2021): (1) the areas of Voronoi cells using the *voronoi.mosaic* function in  
200 the *tripack* package (Renka et al., 2020), and (2) the nearest neighbor distances using the *ndist*  
201 function in the *spatstat* package and only considering the single closest species (i.e.,  $k=1$ ;  
202 Baddeley et al., 2015). Proximity values were normalized at each iteration by dividing by the  
203 maximum distance or area, depending on the approach. A grid-based approach was used to  
204 assess trait diversity throughout the study, whereby a grid of a given resolution was  
205 superimposed onto the trait space (e.g., a 5 by 5 cell grid is shown in Fig. 3a and a 10 by 10 cell  
206 grid in Fig. S2). Trait diversity was the proportion of possible grid cells with at least one species;  
207 redundancy was the mean number of species in occupied possible grid cells.

208  
209 *Ecological persistence*—For the second part of the triage process we focused on three  
210 characteristics (ecological abundance, geographic range size and thermal bleaching  
211 susceptibility) broadly defined as factors contributing to ecological persistence of reef building  
212 coral species. We acknowledge that these characteristics will depend on current taxonomic



213 designations that are currently being revised (Cowman et al., 2020). We used typical abundance  
214 of species data from Veron (2000) and geographic distribution data from Hughes et al. (2013)  
215 downloaded for the 396 species from the Coral Trait Database (Madin et al., 2016). Ecological  
216 abundance was categorized by Veron (2000) as common, uncommon and rare, which we  
217 normalized as 1, 0.5 and 0.25, respectively. Geographic extent was normalized by dividing the  
218 range size of each species by the maximum range size for a species. Normalizing puts  
219 characteristics on the same scale (i.e., between 0 and 1) (Fig. S1). Weightings can also be applied  
220 to characteristics of ecological persistence to augment or diminish their importance, but we did  
221 not do so here.

222  
223 Thermal bleaching susceptibility is an increasingly relevant characteristic for coral ecological  
224 persistence, but it is context dependent, highly variable, and poorly understood. Nonetheless, we  
225 use the Coral Bleaching Index (BI) from Swain et al. (2016) to demonstrate how this variable  
226 might be included in the triage analysis. BI is a value between 0 and 100, where higher values  
227 correspond with more thermally vulnerable species. Therefore, we normalized BI by dividing by  
228 100 and subtracting the result from 1 (i.e., species with values closer to 1 are more resistant to  
229 bleaching based on Swain et al. [2016]). BI values were available at the species level for 212 of  
230 the species, and therefore genus level BIs were used for the remainder of the analysis in order to  
231 retain all 396 species.

232  
233 Restoration of reef corals is a relatively new field (Hein et al., 2021), and so there is little long-  
234 term knowledge of what makes species more or less amenable to the restoration process. A meta-  
235 analysis of coral restoration studies ranked the use of coral growth forms in restoration projects  
236 (Boström-Einarsson et al., 2020). While this ranking likely reflects a historical focus on coral  
237 gardening (i.e., fragmentation) as well as specific situations, such as the demise of branching  
238 *Acropora* species in the Caribbean, we nonetheless utilize this ranking as an index of species  
239 amenability to restoration. Species growth form was downloaded from the Coral Trait Database  
240 and species were ranked from 1 to 6: columnar (1), tabular (2), encrusting (3), foliose (4),  
241 massive (5), and branching (6), which includes corymbose and digitate. This ranking was  
242 normalized by dividing values by six.

243



244 Pairwise associations between PC1, PC2 and normalized ecological persistence variables for  
245 species are shown in Fig. S1. Weighting species by characteristics was done by multiplying  
246 normalized values. Species with values closer to 1—i.e., large ranges, common, and resistant to  
247 bleaching—were considered ecologically persistent. To redirect focus of species selection to  
248 vulnerable species, normalized variables were subtracted from 1 before proceeding. For example,  
249 we also explored the triage process for species that were wide ranging and common, but  
250 susceptible to bleaching.

251  
252 *Triage assessment*—We compared triage results with two contrasting reef assemblages. The first  
253 was the southern-most accretional reef assemblage along the east coast of Australia, Lord Howe  
254 Island, built by approximately 50 coral species; however, we only include the 15 most common  
255 species for our analysis, having greater than 5% mean cover (Table S1). Contrasts were made by  
256 comparing trait combinations in the Lord Howe assemblage with those generated by the triage  
257 process with the same numbers of species ( $n=15$ ). The second set of species are those used for  
258 out-planting for fragments by the Coral Nurture Program on the Great Barrier Reef throughout  
259 the first two years of its planting activity across six northern GBR high value tourism reef sites  
260 (~20,000 out-plants; August 2018 - April 2020; Howlett et al., in review). The program is run by  
261 tourism operators, and so tends to focus on abundant, fast growing branching species with  
262 recognised aesthetic values to the tourism industry. Contrasts were made by comparing trait  
263 combinations of the 39 Coral Nurture Program species with those generated by the triage process  
264 for  $n=39$  species.

## 265 266 **Results**

267  
268 The nearest neighbor distance method produced the most even spread of species in the trait space  
269 (Fig. 2c, points) because the Voronoi area method could not calculate areas for peripheral points  
270 (Fig. 2c, crosses) that were inadvertently retained during the iterative species removal process.

271  
272 Selecting species based solely on maximizing species spread in trait space (i.e., via nearest  
273 neighbor distances) resulted in levels of occupancy in the trait space that were significantly  
274 greater than random (Fig. 3a, yellow line sitting largely above the shaded 95% confidence band).

275 Conversely, selecting species based solely on ecological persistence led to both the lowest  
276 occupancy in the trait space (i.e., spread of morphological and life history traits) and the highest  
277 levels of redundancy (Figs. 3a and 3b green curves, respectively). These levels of occupancy and  
278 redundancy were not significantly different to randomized species selection (black curves in  
279 Figs. 3a and 3b, respectively, where the green “persistence” curves are captured by the shaded  
280 95% confidence bands). Selecting species based on both ecological persistence and trait diversity  
281 resulted in some loss of trait diversity, but with levels of occupancy much greater than ecological  
282 persistence alone (Fig. 3, red curves). Marginal returns in terms of occupancy per species was  
283 high (approximately 5% per species) for the combined triage scenario (i.e., red curve, Fig. 3a) up  
284 until  $n=11$  species, medium (approximately 2% per species) between from  $n=11$  to  $n=28$ , and  
285 low ( $<0.3\%$  per species) above  $n=28$ . The general patterns shown in Fig. 3 were robust to the cell  
286 size of the grid used to calculate occupancy (Fig. S2); with the proviso that more species are  
287 required to maintain specified levels of occupancy and redundancy for finer grids. For example,  
288 the region of medium marginal returns occurred between  $n=29$  and  $n=55$  for the 10 by 10 cell  
289 grid (Fig. S2A, red curve).

290

291 Based on marginal returns, the optimal number of species selected occurred somewhere between  
292 11 and 28. Fig. 4 shows triage values when selecting  $n=20$  species at different stages of the  
293 process for two scenarios: (1) considering ecologically persistent species (large geographic  
294 range, ecologically abundant and resistant to bleaching) (Fig. 4a) and (2) considering large  
295 geographic ranges and ecologically abundant species that are susceptible to bleaching (Fig. 4b).  
296 While there is some overlap among the triage stages, Fig. 4 demonstrated how focal species can  
297 change throughout the selection process. It also shows the selection outcomes of switching  
298 species that are better ecologically, but are difficult to restore based on our criteria, while  
299 simultaneously retaining an even spread of species in the trait space. Fig. 2d contrasts triage for  
300 20 species with and without consideration of trait diversity, illustrating that, while cementers are  
301 captured either way, because they tend to be ecologically persistent species, while builders and  
302 fillers are not captured to the same extent if focused solely on ecological persistence  
303 characteristics.

304

305 The 15 species of Lord Howe Island assemblage showed lower trait diversity and higher  
306 redundancy than would be produced by the triage process (Fig. 3, asterisks). Nonetheless, these  
307 species occupied three highly distinctive trait combinations that largely overlap with the three  
308 functional groups originally put forward by Goreau (1963) (Fig. 2e). The 39 species of the Coral  
309 Nurture Program showed trait diversity markedly lower than expected by randomly selecting  
310 species (Fig. 3a), resulting in high levels of redundancy (Fig. 3b). Indeed, the Lord Howe Island  
311 assemblage showed similar levels of occupancy as the Coral Nurture Program with less than half  
312 the species (Fig. 3a). Fig. 2f illustrates that these out-planted species are the fast growing, high  
313 surface area to volume ratio species, with the exception of *Galaxea fascicularis* (Fig. 3e, red  
314 arrow); they also only tend to capture Goreau's filler species category.

315

## 316 Discussion

317

318 The triage process developed here identified coral species for restoration projects based on both  
319 ecologically beneficial characteristics and diversity of life history trait values. Selection based on  
320 ecological persistence is important for hedging against future species loss, while phenotypic trait  
321 diversity is important for hedging against both species loss and local ecosystem function loss.  
322 The importance of individual species in ecosystem functions are poorly understood, particularly  
323 for reef corals, and therefore our tactic was to prioritize an even spread of species across the trait  
324 space rather than prioritizing particular phenotypic trait values or targeting regions in the trait  
325 space (e.g., Fig. 2b). Even spread across the trait space (measured as gridded occupancy)  
326 increased with the number of species selected; however, marginal returns declined at relatively  
327 low numbers of species (~20 species, Fig. 3a). However, this depended on the resolution at  
328 which the trait space was gridded (Fig. S2). How finely spread species should be across trait  
329 space for preserving particular ecosystem functions remains an open question. Meanwhile, the  
330 number of species that can be selected for a restoration project will ultimately depend upon  
331 project goals, as well as resource and logistical constraints. The flexible triage process developed  
332 here can serve as a framework for such decisions.

333

334 The species lists shown in Fig. 4 is an illustration of outputs that include one potential planning  
335 process, hence the anonymous labelling, as they are based on a relatively narrow set of

336 ecological characteristic and phenotypic trait data. Future studies may build on our initial  
337 analyses by including a broad range of traits (rather than primarily morphological traits presented  
338 here) and imputing trait values for species with missing trait data (Fig. 1). For instance, certain  
339 *Acropora* species are underrepresented in Fig. 4a due to their high bleaching sensitivity. We used  
340 the colony growth form ranking by Bostrom-Einarsson et al. (2020) as the suitability for  
341 restoration trait. This trait is relevant for coral gardening approaches that fragment, grow and  
342 then out-plant adult colonies (Rinkevich 2014). However, for prioritization of species in  
343 restoration initiatives based on propagation of sexually produced coral stock (de la Cruz and  
344 Harrison 2020), we recommend traits other than growth form to be used for defining species'  
345 suitability for restoration, such as the mode of reproduction (large amounts of sexually produced  
346 offspring are easier to obtain from broadcast spawning as compared to brooding species;  
347 Doropoulos et al., 2019), high early life survivorship, and fecundity (species with higher  
348 fecundity can provide larger numbers of sexually produced offspring; Alvarez-Noriega et al.,  
349 2016). An obstacle for selecting species for restoration based on sexual reproduction is that the  
350 knowledge of husbandry is limited for many spawning coral species, and it will always be  
351 challenging to obtain high abundances of sexually produced offspring from brooding species  
352 (Randall et al., 2020). However, the triage process can be used to highlight where husbandry  
353 effort should be directed. For example, Fig. 4 contrasts the best set of species for restoration  
354 based on ecological persistence and trait diversity (middle columns in panels a and b); however,  
355 this list changes when also considering which of these species are amenable to fragmentation and  
356 gardening approaches (last columns). Ideally, coral husbandry and out-planting research should  
357 focus on reducing this mismatch (e.g., Baria & Rodriguez et al., 2019).

358  
359 Our understanding of the species and traits that drive reef functions and services is still  
360 emerging, placing severe limitations on our capacity to select foundation species for restoration.  
361 Many reviews have dealt with the importance of ecosystem functions and services on coral reefs  
362 (Harborne et al., 2006, Brandl et al., 2019; Woodhead et al., 2019), including in the context for  
363 reef restoration practices (Hein et al., 2021). However, for corals, the experimental and  
364 observational evidence linking species to functions is still limited (Brandl et al., 2019), perhaps  
365 because of the long timescales of reef-building. For example, recent restoration work from the  
366 Florida Keys achieved large increases in the cover of *Acropora cervicornis* but little benefit to

367 broader ecological functions (Ladd et al., 2019). Furthermore, in their blueprint for protecting  
368 coral reef functions, Bellwood et al (2019) suggest a hierarchical approach, recognizing that all  
369 functions are not equal, and that priority functions are likely to be context specific and should be  
370 defined in specific restoration objectives. Selecting species based on functions is therefore likely  
371 to vary across systems depending on the specific environment, and the values of the local  
372 stakeholders. Our triage approach addresses both these limitations by hedging against loss of  
373 range of function by capturing a wide range of morphological and life history traits, while  
374 simultaneously enhancing the probability that these traits persist in a range of environments.  
375 Given the uncertainty inherent to all restoration efforts, we suggest that better knowledge of  
376 functions and a clear vision of the goals of restoration is likely to enhance rather than supersede  
377 this triage approach.

378

379 Restoration efforts should explicitly consider the capacity of species to persist in future  
380 environments. An increasingly visible pattern is that there are species that are likely to persist in  
381 future predicted environments ('winners') and those that are likely to decline in future  
382 environments ('losers') (Adam et al., 2021). Whether to protect the hardy or the vulnerable is a  
383 widespread debate throughout conservation biology. For example, when selecting protected  
384 areas, the decision to protect areas of imminent threat or resistant areas generating the best  
385 returns is highly context-dependent (Sacre et al., 2019). Similarly, whether to select winners or  
386 losers for restoration is likely to depend on the severity of the threat to the ecosystem, and the  
387 traits and functions that are most critical to ecological integrity. Indeed, a species-oriented focus  
388 on restoration is likely to favor rare or depleted species with low persistence, while ecosystem-  
389 based restoration is likely to favor foundation species that are dominant and therefore drive  
390 ecosystem functions. The triage approach developed here is specifically designed so that both  
391 these viewpoints can be incorporated.

392

393 This paper's goal was to develop and present a simple and flexible process for decision making  
394 around target species for restoration using real and interpolated data. However, the data and  
395 results presented here should not be used for decisions without further consideration,  
396 consultation and analysis. For example, a multi-criteria decision-making approach is one  
397 pathway (Gouezo et al., 2021). Expert elicitation by coral reef scientists is needed but

398 inadequate, and this process should also include other stakeholders (managers, tourism  
399 operators) and pivotally, First Nations people. Moreover, the value of restoration as a  
400 management intervention per se must be evaluated against or complement alternative tools, such  
401 as protected areas, fish aggregation devices, and artificial structures, and the outcomes of such  
402 assessments vary from one ecosystem function to another (Rogers et al 2015). The ultimate goals  
403 of restoration, and particularly the ecosystem functions being targeted, should be based on the  
404 scale at which restoration has the greatest impact. Moreover, the success of coral restoration  
405 hinges upon addressing local and global actions that facilitate natural coral growth and  
406 reproduction, such as regulating climate, overharvesting and land-use.

407

#### 408 **Authors contributions**

409

410 All authors conceived the idea during a working group meeting organized by MJHvO and KQ.  
411 JSM and MM developed the idea, gathered data and ran analyses. JSM, MM, KQ and MJHvO  
412 wrote the first draft. All authors critically revised drafts and added intellectual content.

413

#### 414 **Acknowledgements**

415

416 The workshop was funded by the Australian Research Council Laureate Fellowship  
417 FL180100036 to MJHvO. CD and LKB acknowledges the Reef Restoration and Adaptation  
418 program. ZR acknowledges Australian Research Council LP160101508.

419

#### 420 **Conflict of Interest**

421

422 The authors declare that they have no known competing financial interests or personal  
423 relationships that could have appeared to influence the work reported in this paper.

424

#### 425 **Data availability statement**

426

427 All data and code are available at [https://github.com/jmadinlab/species\\_choice](https://github.com/jmadinlab/species_choice)

428 **References**

429

430 Adam, A.A., Garcia, R.A., Galaiduk, R., Tomlinson, S., Radford, B., Thomas, L., & Richards,  
431 Z.T. (2021). Diminishing potential for tropical reefs to function as coral diversity  
432 strongholds under climate change conditions. *Diversity & Distributions*, 27, 2245-2261.

433 Adame, M.F., Teutli, C., Santini, N.S., Caamal, J.P., Zaldívar-Jiménez, A., Hernández, R., &  
434 Herrera-Silveira, J.A. (2014). Root Biomass and Production of Mangroves Surrounding a  
435 Karstic Oligotrophic Coastal Lagoon. *Wetlands*, 34, 479–488.

436 Álvarez-Noriega, M., Baird, A.H., Dornelas, M., Madin, J.S., Cumbo, V.R., & Connolly, S.R.  
437 (2016). Fecundity and the demographic strategies of coral morphologies. *Ecology*, 97,  
438 3485–3493.

439 Anthony, K.R.N., Helmstedt, K.J., Bay, L.K., Fidelman, P., Hussey, K.E., Lundgren, P., Mead,  
440 D., McLeod, I.M., Mumby, P.J., Newlands, M., Schaffelke, B., Wilson, K.A., Hardisty,  
441 P.E. (2020) Interventions to help coral reefs under global change—A complex decision  
442 challenge. *PLOS ONE*, 15, e0236399.

443 Baddeley, A., Rubak, E., & Turner, R. (2015). *Spatial Point Patterns: Methodology and*  
444 *Applications with R*. London: Chapman and Hall/CRC Press.

445 Baria-Rodríguez, M.V., dela Cruz, D.W., Dizon, R.M., Yap, H.T., & Villanueva R.D. (2019).  
446 Performance and cost-effectiveness of sexually produced *Acropora granulosa* juveniles  
447 compared with asexually generated coral fragments in restoring degraded reef areas.  
448 *Aquatic Conservation: Marine and Freshwater Ecosystems*, 29, 891-900.

449 Bellwood, D.R., Pratchett, M.S., Morrison, T.H., Gurney, G.G., Hughes, T.P., Álvarez-Romero,  
450 J.G., Day, J.C., Grantham, R., Grech, A., Hoey, A.S., Jones, G.P., Pandolfi, J.M., Tebbett,  
451 S.B., Techera, E., Weeks, R., & Cumming, G.S. (2019). Coral reef conservation in the  
452 Anthropocene: Confronting spatial mismatches and prioritizing functions. *Biological*  
453 *Conservation*, 236, 604–615.

454 Boström-Einarsson, L., Babcock, R.C., Bayraktarov, E., Ceccarelli D., Cook, N., Ferse, S.C.A.,  
455 Hancock, B., Harrison, P., Hein, M., Shaver, E., Smith, A., Suggett, D., Stewart-Sinclair,  
456 P.J., Vardi, T., McLeod, I.M. (2020). Coral restoration – A systematic review of current  
457 methods, successes, failures and future directions. *PLoS ONE*, 15, e0226631.

458 Brainard, J. (2020). Tasmanian devil reintroduced. *Science*, 370,268-268.



- 459 Brandl, S.J., Rasher, D.B., Côté, I.M., Casey, J.M., Darling, E.S., Lefcheck, J.S., Duffy, J.E.  
460 (2019). Coral reef ecosystem functioning: eight core processes and the role of biodiversity.  
461 *Front Ecol Environ*, 17, 445–454.
- 462 Brown, J.H. (1984). On the Relationship between Abundance and Distribution of Species. The  
463 *American Naturalist*, 124, 255–279.
- 464 Brudvig, L.A., Mabry, C.M. (2008). Trait-Based Filtering of the Regional Species Pool to Guide  
465 Understory Plant Reintroductions in Midwestern Oak Savannas, U.S.A. *Restoration*  
466 *Ecology*, 16, 290-304.
- 467 Ceccarelli, D.M., McLeod, I.M., Boström-Einarsson, L., Bryan, S.E., Chartrand, K.M., Emslie,  
468 M.J., Gibbs, M.T., Gonzalez Rivero, M., Hein, M.Y., Heyward, A., Kenyon, T.M., Lewis,  
469 B.M., Mattocks, N., Newlands, M., Schläppy, M.-L., Suggett, D.J., Bay, L.K. (2020).  
470 Substrate stabilisation and small structures in coral restoration: State of knowledge, and  
471 considerations for management and implementation. *PLOS ONE*, 15, e0240846.
- 472 Cowman, P.F., Quattrini, A.M., Bridge, T.C.L., Watkins-Colwell, G.J., Fadli, N., Grinblat, M.,  
473 Roberts, T.E., McFadden, C.S., Miller, D.J., Baird, A.H. (2020). An enhanced target-  
474 enrichment bait set for Hexacorallia provides phylogenomic resolution of the staghorn  
475 corals (Acroporidae) and close relatives. *Molecular Phylogenetics and Evolution*, 153,  
476 106944.
- 477 Darling, E.S., Alvarez-Filip, L., Oliver, T.A., McClanahan, T.R., Côté, I.M. (2012). Evaluating  
478 life-history strategies of reef corals from species traits. *Ecology Letters*, 15,1378–1386.
- 479 De'ath G, Fabricius KE, Sweatman H, Puotinen M (2012) The 27-year decline of coral cover on  
480 the Great Barrier Reef and its causes. *Proc Natl Acad Sci USA* 109:17995-17999
- 481 dela Cruz DW, Harrison PL (2020) Enhancing coral recruitment through assisted mass  
482 settlement of cultured coral larvae. *PLOS ONE* 15:e0242847
- 483 Doropoulos C, Vons F, Elzinga J, ter Hofstede R, Salee K, van Koningsveld M, Babcock RC  
484 (2019) Testing Industrial-Scale Coral Restoration Techniques: Harvesting and Culturing  
485 Wild Coral-Spawn Slicks. *Front Mar Sci* 6:658
- 486 Ellison AM, Bank MS, Clinton BD, Colburn EA, Elliott K, Ford CR, Foster DR, Kloeppel BD,  
487 Knoepp JD, Lovett GM, Mohan J, Orwig DA, Rodenhouse NL, Sobczak WV, Stinson KA,  
488 Stone JK, Swan CM, Thompson J, Von Holle B, Webster JR (2005) Loss of foundation

- 489 species: consequences for the structure and dynamics of forested ecosystems. *Frontiers in*  
490 *Ecology and the Environment* 3:479–486.
- 491 Fredriksen S, Filbee-Dexter K, Norderhaug KM, Steen H, Bodvin T, Coleman MA, Moy F,  
492 Wernberg T (2020) Green gravel: a novel restoration tool to combat kelp forest decline.  
493 *Scientific reports* 10:3983
- 494 Gaitán-Espitia JD, Hobday AJ (2021) Evolutionary principles and genetic considerations for  
495 guiding conservation interventions under climate change. *Glob Change Biol* 27:475–488
- 496 Gallagher RV, Falster DS, Maitner BS, Salguero-Gómez R, Vandvik V, Pearse WD, Schneider  
497 FD, Kattge J, Poelen JH, Madin JS, Ankenbrand MJ, Penone C, Feng X, Adams VM,  
498 Alroy J, Andrew SC, Balk MA, Bland LM, Boyle BL, Bravo-Avila CH, et al. (2020) Open  
499 Science principles for accelerating trait-based science across the Tree of Life. *Nature*  
500 *Ecology & Evolution* 4:294–303
- 501 Game ET, Tallis H, Olander L, Alexander SM, Busch J, Cartwright N, Kalies EL, Masuda YJ,  
502 Mupepele A-C, Qiu J, Rooney A, Sills E, Sutherland WJ (2018) Cross-discipline evidence  
503 principles for sustainability policy. *Nat Sustain* 1:452–454
- 504 Giannini TC, Giulietti AM, Harley RM, Viana PL, Jaffe R, Alves R, Pinto CE, Mota NFO,  
505 Caldeira CF, Imperatriz-Fonseca VL, Furtini AE, Siqueira JO (2017) Selecting plant  
506 species for practical restoration of degraded lands using a multiple-trait approach. *Austral*  
507 *Ecology* 42:510–521
- 508 González-Barrios FJ, Álvarez-Filip L (2018) A framework for measuring coral species-specific  
509 contribution to reef functioning in the Caribbean. *Ecological Indicators* 95:877–886
- 510 Goreau TF (1963) Calcium carbonate deposition by coralline algae and corals in relation to their  
511 roles as reef-builders. *Comparative Biology of Calcified Tissue*, Volume 109, Issue 1 pp.  
512 127-167.
- 513 Gouezo M, Fabricius K, Harrison P, Golbuu Y, Doropoulos C (2021) Optimizing coral reef  
514 recovery with context-specific management actions at prioritized reefs. *Journal of*  
515 *Environmental Management* 295:113209
- 516 Graham NAJ, Nash KL (2013) The importance of structural complexity in coral reef ecosystems.  
517 *Coral Reefs* 32:315–326
- 518 Hale SL, Koprowski JL (2018) Ecosystem-level effects of keystone species reintroduction: a  
519 literature review: Effects of keystone species reintroduction. *Restor Ecol* 26:439–445

- 520 Halford A, Cheal AJ, Ryan D, Williams DMcB (2004) Resilience to large-scale disturbance in  
521 coral and fish assemblages on the Great Barrier Reef. *Ecology* 85:1892–1905
- 522 Harborne AR, Mumby PJ, Micheli F, Perry CT, Dahlgren CP, Holmes KE, Brumbaugh DR  
523 (2006) The Functional Value of Caribbean Coral Reef, Seagrass and Mangrove Habitats to  
524 Ecosystem Processes. *Advances in Marine Biology*. Elsevier, pp 57–189
- 525 Hein MY, Vardi T, Shaver EC, Pioch S, Boström-Einarsson L, Ahmed M, Grimsditch G,  
526 McLeod IM (2021) Perspectives on the Use of Coral Reef Restoration as a Strategy to  
527 Support and Improve Reef Ecosystem Services. *Front Mar Sci* 8:618303
- 528 Hobbs RJ, Hallett LM, Ehrlich PR, Mooney HA (2011) Intervention Ecology: Applying  
529 Ecological Science in the Twenty-first Century. *BioScience* 61:442–450
- 530 Hock K, Wolff NH, Ortiz JC, Condie SA, Anthony KRN, Blackwell PG, Mumby PJ (2017)  
531 Connectivity and systemic resilience of the Great Barrier Reef. *PLoS Biol* 15:e2003355
- 532 Howlett L, et al. (in review) Adoption of coral propagation and out-planting via the tourism  
533 industry to advance site stewardship on the northern Great Barrier Reef.
- 534 Hughes TP, Bellwood DR, Connolly SR, Cornell HV, Karlson RH (2014) Double Jeopardy and  
535 Global Extinction Risk in Corals and Reef Fishes. *Current Biology* 24:2946–2951
- 536 Hughes TP, Kerry JT, Álvarez-Noriega M, Álvarez-Romero JG, Anderson KD, Baird AH,  
537 Babcock RC, Beger M, Bellwood DR, Berkelmans R (2017) Global warming and recurrent  
538 mass bleaching of corals. *Nature* 543:373-377
- 539 Hughes, T. P., Connolly, S. R., Keith, S. A. (2013) Geographic ranges of reef corals (Cnidaria:  
540 Anthozoa: Scleractinia) in the Indo-Pacific. *Ecology* 94, 1659
- 541 Ladd MC, Burkepile DE, Shantz AA (2019) Near-term impacts of coral restoration on target  
542 species, coral reef community structure, and ecological processes. *Restor Ecol* 27:1166–  
543 1176
- 544 Ladouceur E, Shackelford N (2021) The power of data synthesis to shape the future of the  
545 restoration community and capacity. *Restor Ecol* 29:
- 546 Lamb D (2018) Undertaking large-scale forest restoration to generate ecosystem services:  
547 Landscape restoration and ecosystem services. *Restor Ecol* 26:657–666
- 548 Lott MJ, Wright BR, Kemp LF, Johnson RN, Hogg CJ (2020) Genetic Management of Captive  
549 and Reintroduced Bilby Populations. *J Wildl Manage* 84:20-32

- 550 Madin JS, Anderson KD, Andreasen MH, Bridge TCL, Cairns SD, Connolly SR, Darling ES,  
551 Diaz M, Falster DS, Franklin EC, Gates RD, Hoogenboom MO, Huang D, Keith SA,  
552 Kosnik MA, Kuo C-Y, Lough JM, Lovelock CE, Luiz O, Martinelli J, et al. (2016) The  
553 Coral Trait Database, a curated database of trait information for coral species from the  
554 global oceans. *Scientific Data* 3:160017
- 555 Marshall N, Marshall P, Curnock M, Pert P, Smith A, Visperas B (2019) Identifying indicators  
556 of aesthetics in the Great Barrier Reef for the purposes of management. *PLoS ONE*  
557 14:e0210196
- 558 McAfee D, Costanza R, Connell SD (2021) Valuing marine restoration beyond the ‘too small  
559 and too expensive.’ *Trends in Ecology & Evolution* 36:968–971
- 560 McWilliam M, Hoogenboom MO, Baird AH, Kuo C-Y, Madin JS, Hughes TP (2018)  
561 Biogeographical disparity in the functional diversity and redundancy of corals. *Proceedings*  
562 *of the National Academy of Sciences* 115:3084–3089
- 563 Meli P, Martínez-Ramos M, Rey-Benayas JM (2013) Selecting Species for Passive and Active  
564 Riparian Restoration in Southern Mexico: Selecting Species for Riparian Restoration.  
565 *Restor Ecol* 21:163–165
- 566 Orth RJ, Lefcheck JS, McGlathery KS, Aoki L, Luckenbach MW, Moore KA, Oreska MPJ,  
567 Snyder R, Wilcox DJ, Lusk B (2020) Restoration of seagrass habitat leads to rapid  
568 recovery of coastal ecosystem services. *Science Advances* 6:eabc6434
- 569 R Core Team (2021). R: A language and environment for statistical computing. R Foundation for  
570 Statistical Computing, Vienna, Austria. URL <https://www.R-project.org/>.
- 571 Randall CJ, Negri AP, Quigley KM, Foster T, Ricardo GF, Webster NS, Bay LK, Harrison PL,  
572 Babcock RC, Heyward AJ (2020) Sexual production of corals for reef restoration in the  
573 Anthropocene. *Mar Ecol Prog Ser* 635:203-232
- 574 Rayome D, DiManno N, Ostertag R, Cordell S, Fung B, Vizzone A, Pante P, Tate R (2019)  
575 Restoring Ecosystem Services Tool (REST): a Computer Program for Selecting Species for  
576 Restoration Projects Using a Functional-Trait Approach. 58
- 577 Renka RJ, Gebhardt A, Eglen S, Zuyev S, White D (2020) tripack: Triangulation of Irregularly  
578 Spaced Data. R package version 1.3-9.1
- 579 Rinkevich B (2014) Rebuilding coral reefs: does active reef restoration lead to sustainable reefs?  
580 *Current Opinion in Environmental Sustainability* 7:28-36

- 581 Ripple WJ, Estes JA, Beschta RL, Wilmers CC, Ritchie EG, Hebblewhite M, Berger J,  
582 Elmhagen B, Letnic M, Nelson MP, Schmitz OJ, Smith DW, Wallach AD, Wirsing AJ  
583 (2014) Status and Ecological Effects of the World's Largest Carnivores. *Science*  
584 343:1241484
- 585 Rogers A, Harborne AR, Brown CJ, Bozec Y-M, Castro C, Chollett I, Hock K, Knowland CA,  
586 Marshall A, Ortiz JC, Razak T, Roff G, Samper-Villarreal J, Saunders MI, Wolff NH,  
587 Mumby PJ (2015) Anticipative management for coral reef ecosystem services in the 21st  
588 century. *Glob Change Biol* 21:504–514
- 589 Sacre E, Bode M, Weeks R, Pressey RL (2019) The context dependence of frontier versus  
590 wilderness conservation priorities. *Conservation Letters* 12:
- 591 Staude IR, Navarro LM, Pereira HM (2020) Range size predicts the risk of local extinction from  
592 habitat loss. *Global Ecol Biogeogr* 29:16–25
- 593 Stearns, S. (1992). *The Evolution of Life Histories*. Oxford ; New York: Oxford University Press.
- 594 Strassburg BBN, Iribarrem A, Beyer HL, Cordeiro CL, Crouzeilles R, Jakovac CC, Braga  
595 Junqueira A, Lacerda E, Latawiec AE, Balmford A, Brooks TM, Butchart SHM, Chazdon  
596 RL, Erb K-H, Brancalion P, Buchanan G, Cooper D, Díaz S, Donald PF, Kapos V, Leclère  
597 D, Miles L, Obersteiner M, Plutzer C, de M. Scaramuzza CA, Scarano FR, Visconti P  
598 (2020) Global priority areas for ecosystem restoration. *Nature* 586:724–729
- 599 Suding KN, Gross KL, Houseman GR (2004) Alternative states and positive feedbacks in  
600 restoration ecology. *Trends in Ecology & Evolution* 19:46–53
- 601 Suggett DJ, Camp EF, Edmondson J, Boström Einarsson L, Ramler V, Lohr K, Patterson JT  
602 (2019) Optimizing return on effort for coral nursery and outplanting practices to aid  
603 restoration of the Great Barrier Reef. *Restor Ecol* 27:683–693
- 604 Swain TD, Vega Perkins JB, Oestreich WK, Triebold C, DuBois E, Henss J, Baird A, Siple M,  
605 Backman V, Marcelino L (2016) Coral bleaching response index: a new tool to standardize  
606 and compare susceptibility to thermal bleaching. *Glob Change Biol* 22:2475–2488
- 607 Vanderklift MA, Doropoulos C, Gorman D, Leal I, Minne AJP, Statton J, Steven ADL,  
608 Wernberg T (2020) Using Propagules to Restore Coastal Marine Ecosystems. *Front Mar*  
609 *Sci* 7:724
- 610 Veron, J. E. N. (2000) *Corals of the World*. Australian Institute of Marine Science and CCR Qld  
611 Pty Ltd.

- 612 Villéger S, Mason NWH, Mouillot D (2008) New multidimensional functional diversity indices  
613 for a multifaceted framework in functional ecology. *Ecology* 89:2290–2301
- 614 Westoby M, Falster DS, Moles AT, Vesk PA, Wright IJ (2002) Plant Ecological Strategies:  
615 Some Leading Dimensions of Variation Between Species. *Annual Review of Ecology and*  
616 *Systematics* 33:125–159
- 617 Woodhead, A.J., Hicks, C.C., Norström, A.V., Williams, G.J., Graham, N.A.J. (2019) Coral reef  
618 ecosystem services in the Anthropocene. *Funct Ecol*, 1365-2435.13331.
- 619 Zawada, K.J.A., Dornelas, M., Madin, J.S. (2019) Quantifying coral morphology. *Coral Reefs*  
620 38,1281–1292.

621 **Figure 1.** Selecting sets of species for restoration with a two-part triage approach. The orange  
622 panel shows ecological functions that are important or threatened. If mechanistic linkages  
623 between life history traits and functions are established, then triage could focus on specific high-  
624 priority functions (left blue panel). Alternatively, a bet hedging approach that maximizes the  
625 diversity of functional and life history traits increases the likelihood that multiple functions are  
626 performed across a range of environments (right blue panel). Next, the species supporting  
627 functions are narrowed down further to include only those with characteristics that enhance or  
628 diminish their chances of persisting (green panel), resulting in different lists of species (yellow  
629 panel).

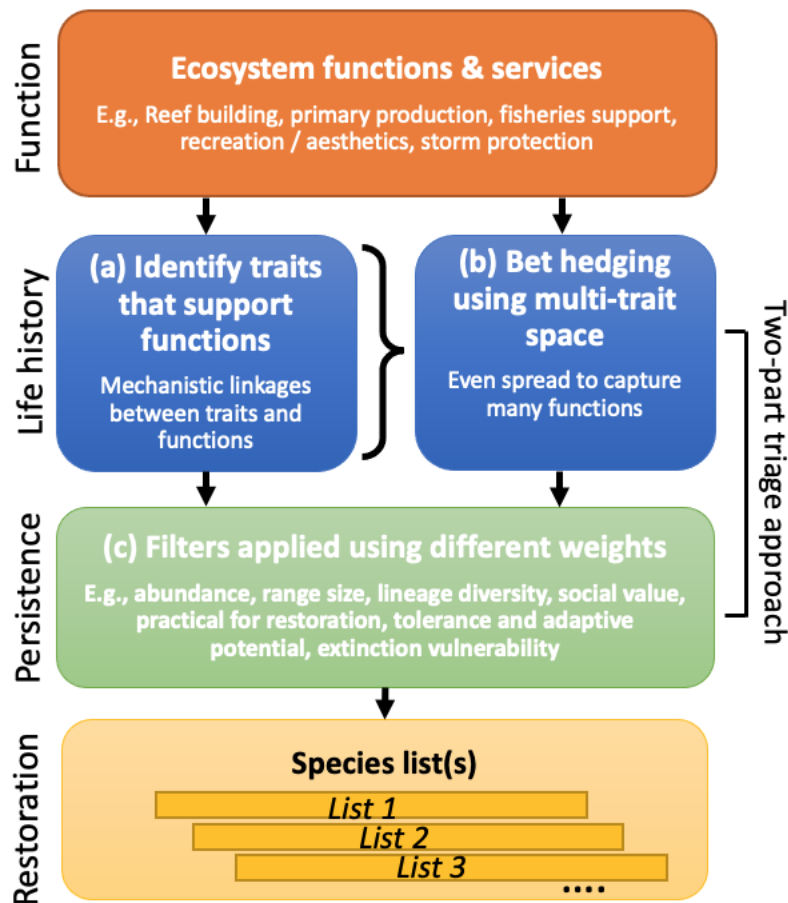

630



631 **Figure 2.** Phenotypic trait space is represented as the first two principal component axes for 396  
632 east coast Australia coral species. **(a)** The trait loadings: growth rate (GR), corallite width (CW),  
633 rugosity/branch spacing (R), surface area per unit volume (SAV), colony height (CH), maximum  
634 colony size/diameter (MCS), and skeletal density (SD). Red vectors are Goreau's (1963)  
635 categories of essential reef builders. **(b)** An overlay illustrating where several functions  
636 approximately lie in trait space. Some functions require species broadly across the space,  
637 whereas others only a limited region of the space. **(c)** Selections of evenly spread species (n=20)  
638 calculated using nearest neighbor distances (points) and Voronoi cell areas (crosses and dashed  
639 line). **(d)** Selections based on ecological persistence characteristics only (crosses and grey  
640 shading) and then with the addition of trait diversity weighting (points) demonstrating the two-  
641 part triage. **(e)** The 15 common Lord Howe Island species (crosses) and 15 species selected using  
642 the triage approach (points). **(f)** The 39 Coral Nurture Program species (crosses) and 39 species  
643 selected using the triage approach (points). The red arrow shows an outlier species, *Galaxea*  
644 *fascicularis*.

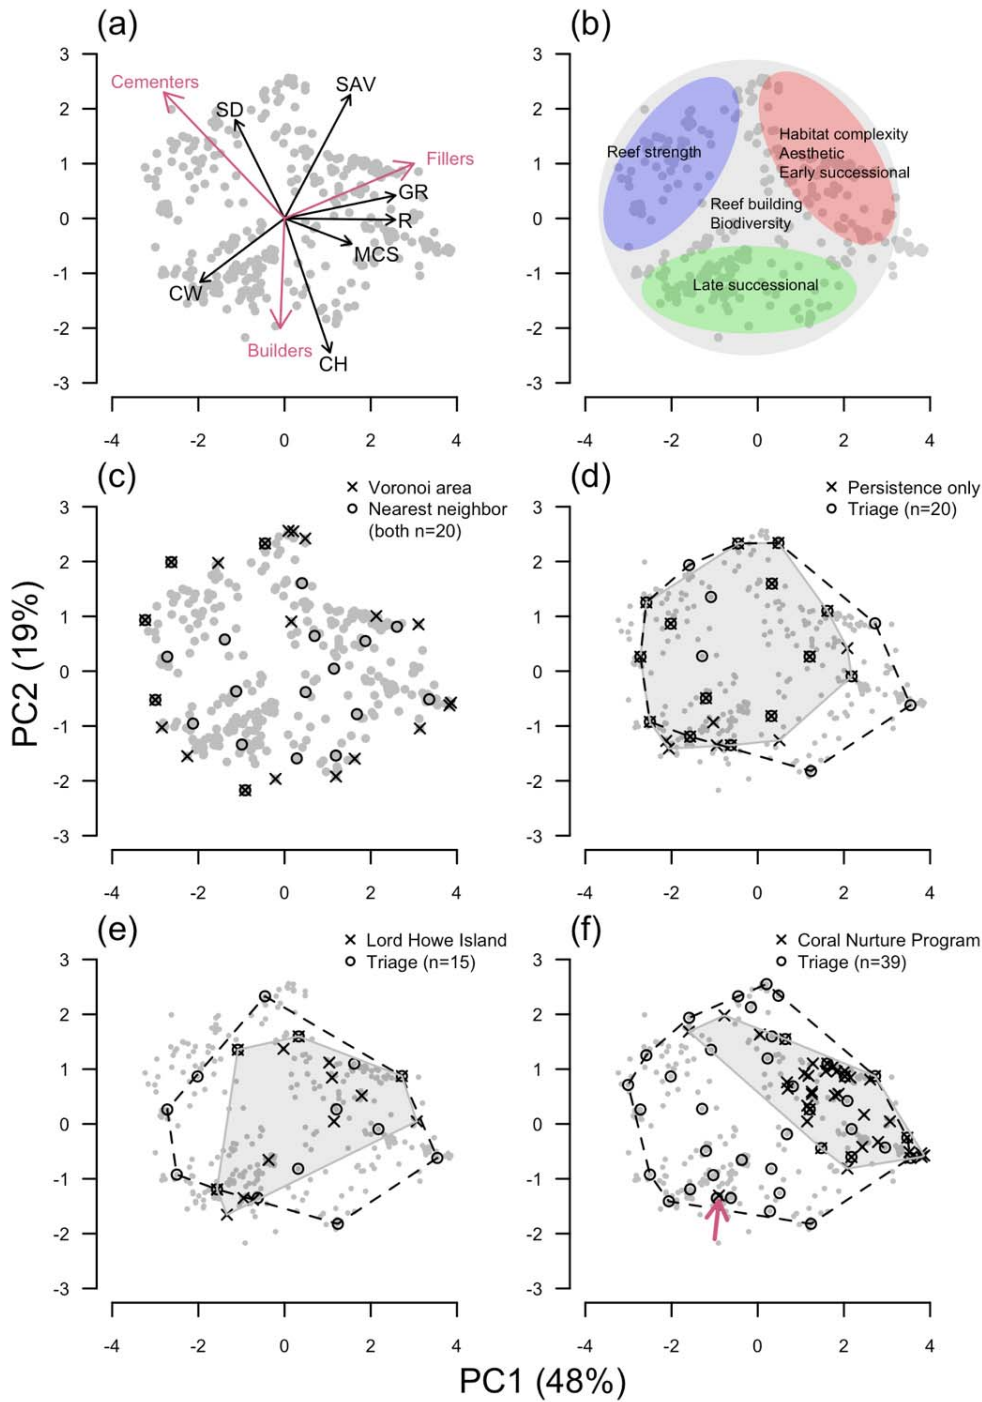

645

646 **Figure 3.** (a) Proportion occupancy and (b) redundancy in trait space as a function of number of  
647 species  $n$  using a 5 by 5 cell grid (inset in panel a). Regions of high, medium and low marginal  
648 returns delineated with dotted vertical lines. Included are symbols that show trait diversity and  
649 redundancy for common species at Lord Howe Island ( $n=15$ ) and for the Coral Nurture Program  
650 ( $n=39$ ). The grey shaded region shows 95% CIs for randomized species selection.

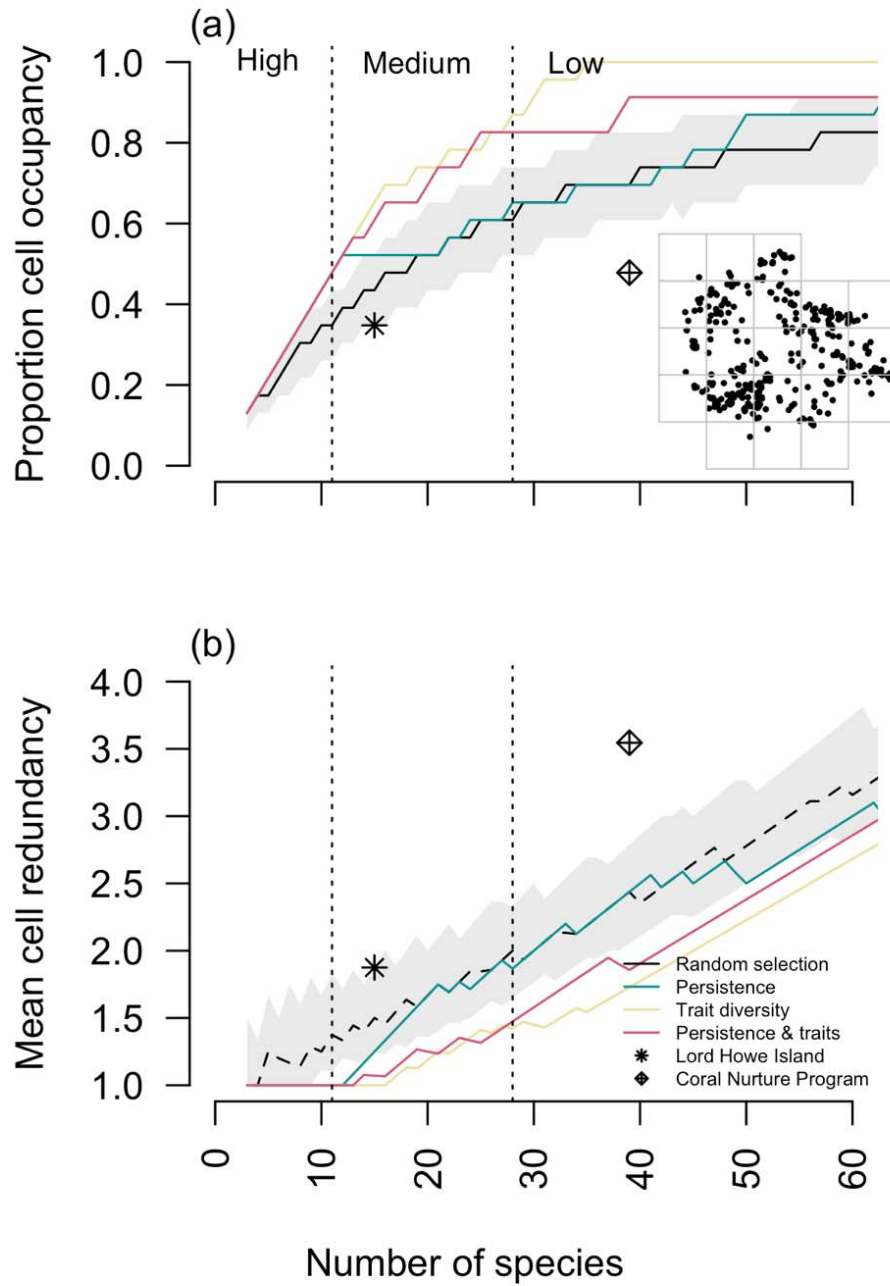

651

652 **Figure 4.** Species selected ( $n=20$ ) at different stages of the triage process when focusing on **(a)**  
653 ecological persistent species in terms of range size and local abundance, bleaching resistance,  
654 and suitability for restoration, and **(b)** species that have a large range size and are ecologically  
655 abundant, vulnerable to bleaching, and suitable for restoration. Values (and heat colors)  
656 correspond with a species triage score at successive stages. Asterisks (\*) denote species found at  
657 Lord Howe Island; pluses (+) denote Coral Nurture Program species from Howlett et al. (in  
658 review).

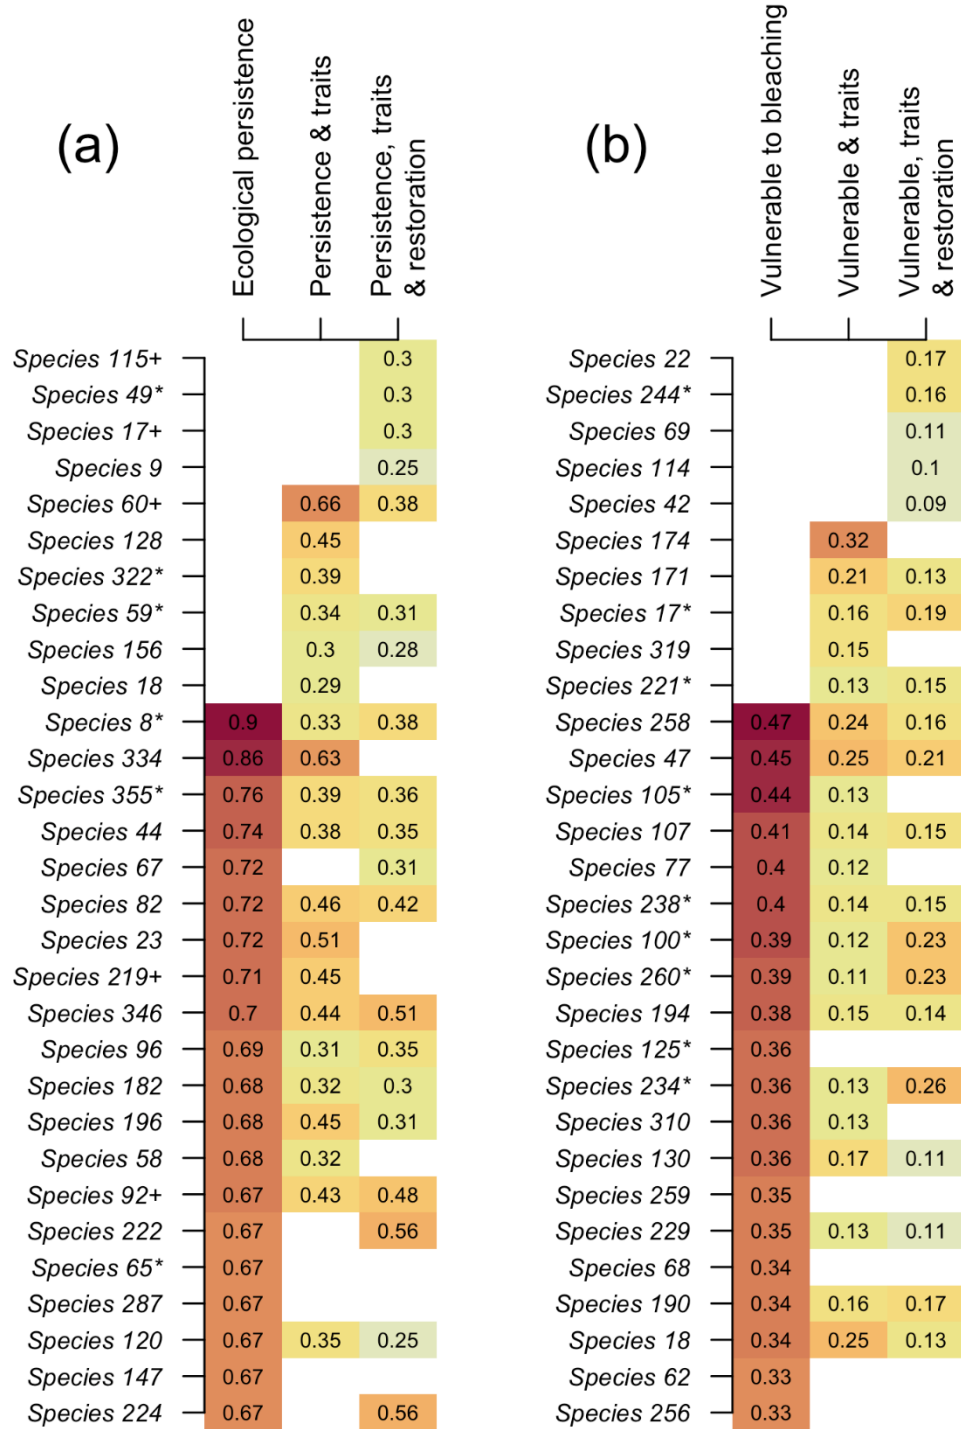

659
